# Supplementary material
Source: PubMed Central journal article supplement (PMC5790201)
Supplement: NIHMS932389-supplement-2.pdf [file NIHMS932389-supplement-2.pdf]

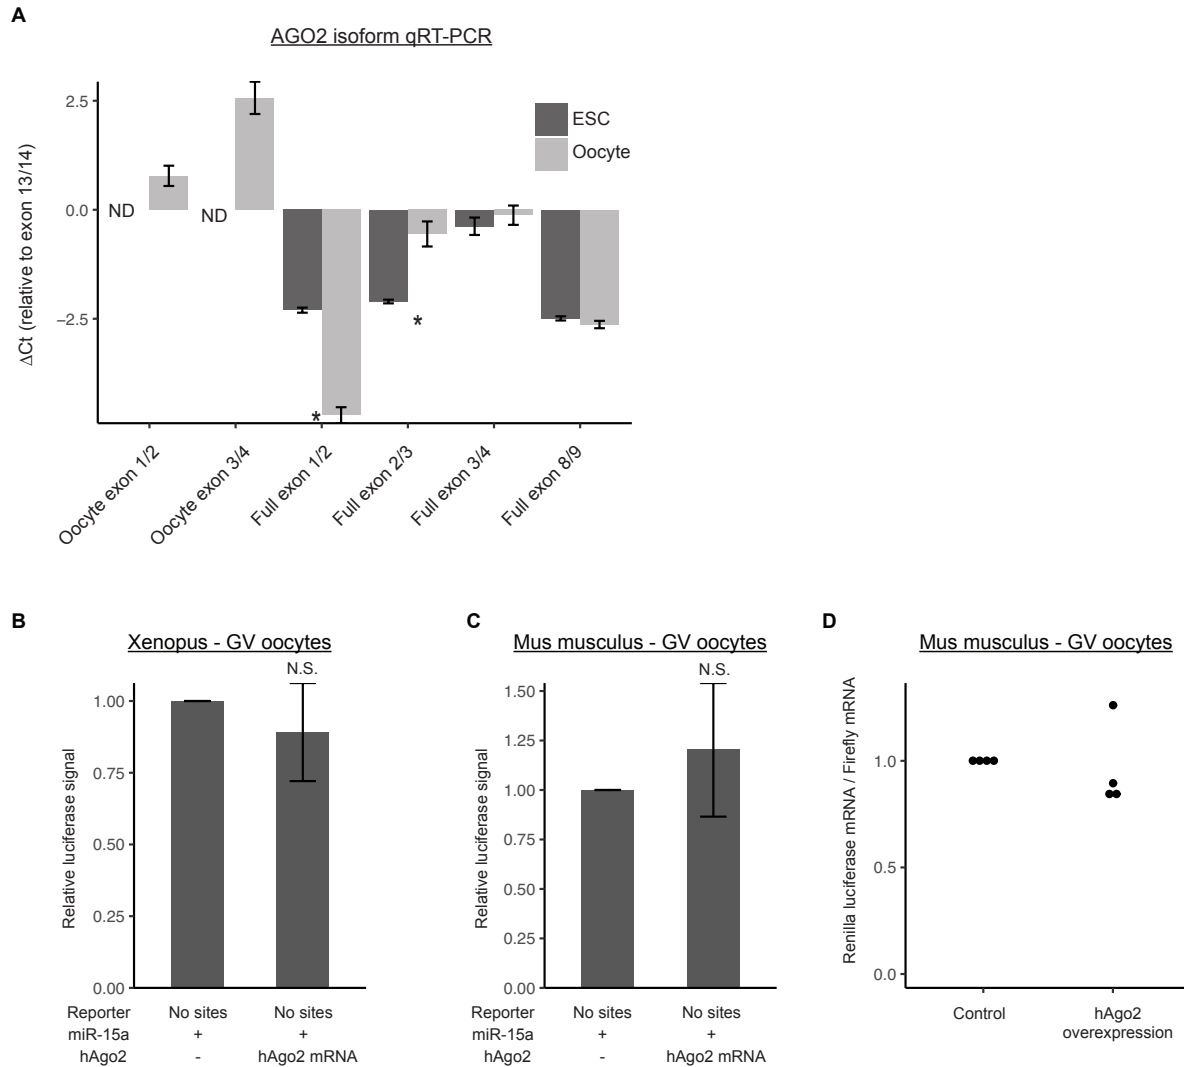

**Figure S2 – Characterization of Oocyte-specific Ago2 isoform. Related to Figure 2.**

A) qRT-PCR with primers spanning exons in full length or oocyte specific AGO2. Data is  $\Delta$ Ct in embryonic stem cells and GV oocytes relative to primers spanning exon 13/14. Embryonic stem cell N=2, oocyte N=3. ND = Not detected. Asterisks (\*) represent significantly different data from the corresponding ‘ESC’ control data (Student’s T-test,  $p < 0.05$ ). Luciferase assays in (B) Xenopus GV oocytes or (C) mouse GV oocytes following injection of miR-15a mimic, reporter lacking target sites, plus and minus wild-type AGO2 mRNA. N=10 for B, N=2 for C. D) RT-qPCR for Renilla 4x Bulge and Firefly in either control (WT or LSL-GFP-myc-hAgo2/+; Zp3-Cre-) or AGO2 overexpressing (injected with AGO2 mRNA or LSL-GFP-myc-hAGO2/+; Zp3-Cre+) mouse GV oocytes along with miR-15a mimic. Dots represent biological replicates. N=4. All error bars represent standard deviation. N.S. = not significant.

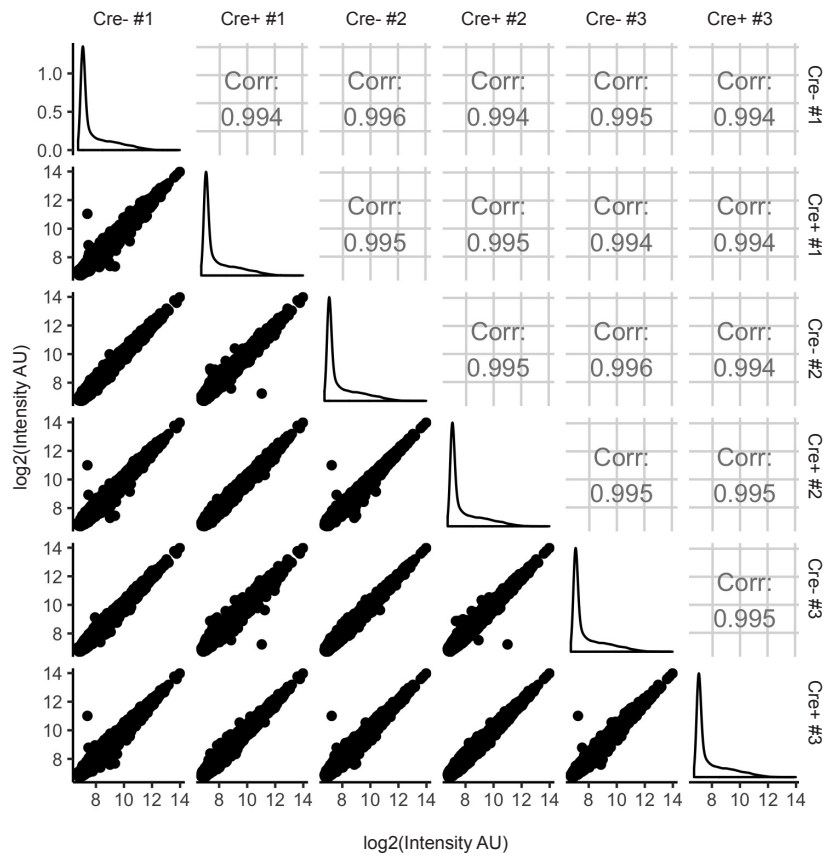

**Figure S3 – Correlations between arrays. Related to Figure 3.**

A) Log2 quantile normalized intensity values between replicates of LSL-GFP-myc-hAGO2/LSL-GFP-myc-hAGO2; Zp3-Cre+ and Zp3-Cre- mouse GV oocytes injected with miR-15a mimic.

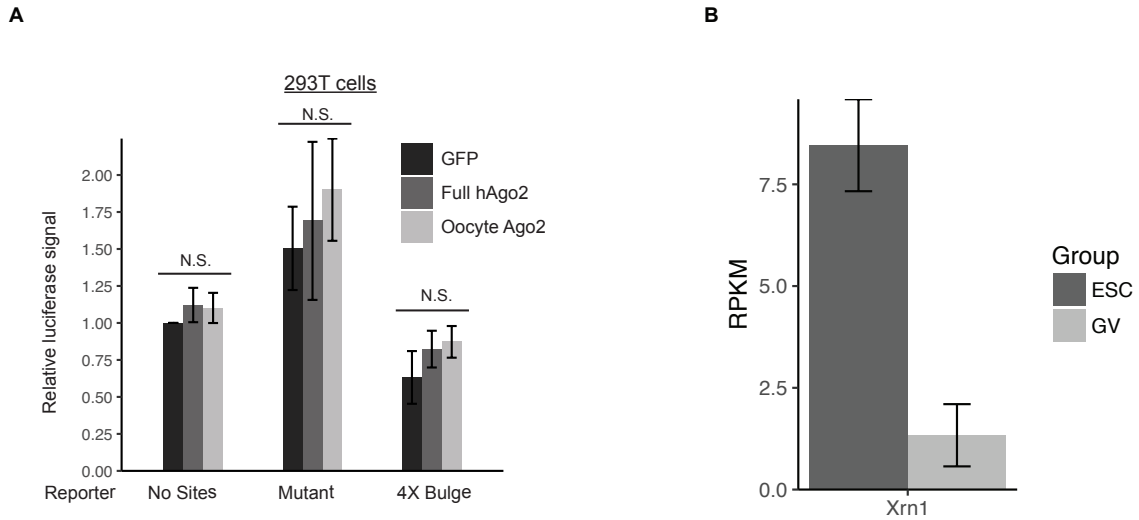

**Figure S4 – Evaluation of additional potential mechanisms that impact miRNA activity. Related to Figure 4.**  
 A) Luciferase assay in HEK-293T cells transfected with psiCHECK2, a vector containing Firefly luciferase and Renilla luciferase with either no let-7 sites, mutated sites, or 4X Bulge sites in the 3' UTR for Renilla luciferase. psiCHECK2 was co-transfected with either GFP, full length hAGO2, or truncated oocyte AGO2. Luciferase data is a ratio of Renilla signal over Firefly signal. Full and truncated AGO2 is not significantly different from GFP control in all cases. All error bars represent standard deviation. N.S. = not significant. B) RNA-Seq expression of Xrn1 in mouse embryonic stem cells and mouse GV oocytes.

|                    |                                                                  |
|--------------------|------------------------------------------------------------------|
| Let7Perfect Sense  | TCGAATAAACTATACAACCTACTACCTCC                                    |
| Let7Perfect Anti   | GGCCGGAGGTAGTAGGTTGTATAGTTTAT                                    |
| Let7Bulge Sense1   | TCGAATAAACTATACACATACTACCTCCGATACTATACACATACTA<br>CCTCACGCGT     |
| Let7Bulge Sense2   | ACTATACACATACTACCTCTCACACTATACACATACTACCTCC                      |
| Let7Bulge Anti1    | GGCCGGAGGTAGTATGTGTATAGTGTGAGAGGTAGTATGTGTATA<br>GTACGCGT        |
| Let7Bulge Anti2    | GAGGTAGTATGTGTATAGTATCGGAGGTAGTATGTGTATAGTTTAT                   |
| Let7Mutant Sense1  | TCGAATAAACTATACACATAATCCATCCGATACTATACACATAATC<br>CATCACGCGT     |
| Let7Mutant Sense2  | ACTATACACATAATCCATCTCACACTATACACATAATCCATCC                      |
| Let7Mutant Anti1   | GGCCGGATGGATTATGTGTATAGTGTGAGATGGATTATGTGTATAG<br>TACGCGT        |
| Let7Mutant Anti2   | GATGGATTATGTGTATAGTATCGGATGGATTATGTGTATAGTTTAT                   |
| miR15Perfect Sense | TCGAATAACACAAACCATTATGTGCTGCTAC                                  |
| miR15Perfect Anti  | GGCCGTAGCAGCACATAATGGTTTGTGTTAT                                  |
| miR15Bulge Sense1  | TCGAATAAcacaaacctCAgtgctgctaCGATcacaaacctCAgtgctgctaACGCGT       |
| miR15Bulge Sense2  | cacaaacctCAgtgctgctaTCACcacaaacctCAgtgctgctaC                    |
| miR15Bulge Anti1   | GGCCGTAGCAGCACTGATGGTTTGTGGTGATAGCAGCACTGATGGT<br>TTGTGACGCGT    |
| miR15Bulge Anti2   | TAGCAGCACTGATGGTTTGTGATCGTAGCAGCACTGATGGTTTGTG<br>TTAT           |
| miR15Mutant Sense1 | TCGAATAACACAAACCATCAGTTCGGATACGATCACAAACCATCA<br>GTTCCGATAACGCGT |
| miR15Mutant Sense2 | CACAAACCATCAGTTCGGATATCACCACAAACCATCAGTTCGGATA<br>C              |
| miR15Mutant Anti1  | GGCCGTATCCGAACTGATGGTTTGTGGTGATATCCGAACTGATGGT<br>TTGTGACGCGT    |
| miR15Mutant Anti2  | TATCCGAACTGATGGTTTGTGATCGTATCCGAACTGATGGTTTGTG<br>TTAT           |
|                    |                                                                  |

|                                |                          |
|--------------------------------|--------------------------|
| Rosa26 Ago2 common genotyping  | CCAAAGTCGCTCTGAGTTGTTATC |
| Rosa26 Ago2 WT RVS genotyping  | GAGCGGGAGAAAATGGATATG    |
| Rosa26 Ago2 MUT RVS genotyping | CGGGCCATTTACCGTAAG       |
| Cre genotyping FWD genotyping  | tggcgcatggtgcaagt        |
| Cre genotyping RVS genotyping  | cggctgaaccagcttttc       |
| Il2 genotyping FWD genotyping  | ctagccacagaattgaaagatct  |
| Il2 genotyping RVS genotyping  | gtagtggaattctagcatcatcc  |
|                                |                          |
| RPL7 qPCR FWD                  | gattgtggagccatacattgca   |
| RPL7 qPCR RVS                  | tgccgtagcctcgttct        |
| mouse human Ago2 qPCR FWD      | ctcacctggtggccttc        |
| mouse human Ago2 qPCR RVS      | agaggtatggcttcctcagc     |
|                                |                          |
| Oocyte Exon 1 - Exon 2         | AGAATCCTTCCTGCCTTCCTTC   |
| Oocyte Exon 1 - Exon 2         | TTGAAGGCATATCCTGGGATGG   |
| WT Exon 2 - Exon 3             | GGACATCAAACCTGAGAAATGCC  |
| WT Exon 2 - Exon 3             | TCCATCAAACACTGGCTTCC     |
| Oocyte Exon 3 - Exon 4         | TACACAGCAATGCCCCTTCC     |
| Oocyte Exon 3 - Exon 4         | CAGTTCATGCTTCTGCTCTTGC   |
| WT Exon 1 - Exon 2             | GCAACGCCACCATGTACTC      |
| WT Exon 1 - Exon 2             | TTGAAGGCATATCCTGGGATGG   |
| WT Exon 3 - Exon 4             | AGCCAGTGTTTGATGGAAGG     |
| WT Exon 3 - Exon 4             | ATGCGATCTTTGCCTTCTCC     |
| WT Exon 8 - Exon 9             | cagacaatcagacctcaacctg   |
| WT Exon 8 - Exon 9             | cacttcgcatcagtttgctg     |

|                      |                        |
|----------------------|------------------------|
| WT Exon 13 - Exon 14 | acagaccctatccaatctctgc |
| WT Exon 13 - Exon 14 | atgacagggtgctggaacac   |
|                      |                        |
| Renilla qPCR FWD     | ACGCAAACGCATGATCACTG   |
| Renilla qPCR RVS     | GCAGAAAAATCACGGCGTTC   |
| Firefly qPCR FWD     | CGTGCCAGAGTCTTTCGACA   |
| Firefly qPCR RVS     | ACAGGCGGTGCGATGAG      |

**Table S1: Oligonucleotides used in this study. Related to STAR Methods.**
